# Supplementary material
Source: PubMed Central journal article supplement (PMC5115525)
Supplement: ADVS-3-0a-s001.pdf [file ADVS-3-0a-s001.pdf]

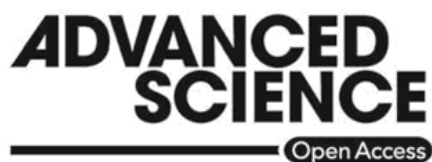

## Supporting Information

for *Adv. Sci.*, DOI: 10.1002/advs.201600122

Engineering Intrinsically Zirconium-89 Radiolabeled Self-Destructing Mesoporous Silica Nanostructures for In Vivo Biodistribution and Tumor Targeting Studies

*Shreya Goel, Feng Chen, Shijie Luan, Hector F. Valdovinos, Sixiang Shi, Stephen A. Graves, Fanrong Ai, Todd E. Barnhart, Charles P. Theuer, and Weibo Cai\**

## Supporting Information

### **Engineering Intrinsically Zirconium-89 Radiolabeled Self-Destructing Mesoporous Silica Nanostructures for In Vivo Biodistribution and Tumor Targeting Studies**

*Shreya Goel, Feng Chen, Shijie Luan, Hector F. Valdovinos, Sixiang Shi, Stephen A. Graves, Fanrong Ai, Todd E. Barnhart, Charles P.Theuer, Weibo Cai\**

S. Goel and S. Shi

Materials Science Program, University of Wisconsin – Madison, Wisconsin 53705

Dr. F. Chen and Dr. F. Ai

Department of Radiology, University of Wisconsin – Madison, Wisconsin 53705

S. Luan

School of Pharmacy, Temple University, Philadelphia, Pennsylvania 19140

H.F. Valdovinos, S. Graves and Dr. T.E. Barnhart

Department of Medical Physics, University of Wisconsin – Madison

Dr. C.P. Theuer

TRACON Pharmaceuticals Inc., San Diego, California 92122

Prof. W. Cai

Materials Science Program, University of Wisconsin – Madison, Wisconsin 53705

Department of Radiology, University of Wisconsin – Madison, Wisconsin 53705

Department of Medical Physics, University of Wisconsin – Madison

University of Wisconsin Carbone Cancer Centre, Madison, Wisconsin 53705

Fax: (+1) 608-265-0614

Email: [WCai@uwhealth.org](mailto:WCai@uwhealth.org)

Homepage: <http://mi.wisc.edu>

**Keywords:** Biodegradable mesoporous silica nanoparticles, Intrinsic radiolabeling, Positron emission tomography (PET) imaging, Vasculature targeting

### S.1. Theoretical Calculations for the number of nanoparticles (bMSNs)

Theoretical calculations to determine the number of nanoparticles per gram were based on a previously reported procedure.<sup>[1]</sup>

Volume of a mesoporous nanoparticle, such as bMSN can be divided into (i) pore volume, ( $V_p$ ) and solid volume ( $V_s$ ).  $V_p$  was determined from the BET data, while  $V_s$  was determined using

the following equation:  $V_s = \frac{M_s}{\rho_s} = \frac{1}{2.2} = 0.455 \text{ cm}^3$  where  $M_s$  is the mass of bMSNs in grams and  $\rho$  is the density of silica ( $2.2 \text{ gcm}^{-3}$ ).

Number of bMSNs per gram  $N_{\text{bMSN}} = \frac{1}{M_{\text{bMSN}}}$ , where  $M_{\text{bMSN}}$  is the mass of each nanoparticle.

$M_{\text{bMSN}} = \rho * V_{\text{bMSN}} = \rho * \frac{4\pi r^3}{3} (1 - \chi)$ ; where  $r$  = radius of bMSN as determined from

TEM images (*Figure S2c*;  $r = 82.68 \text{ nm}$ ) and  $\chi$  is the pore volume fraction defined as  $\chi =$

$\frac{V_p}{V_p + V_s}$ . Therefore, making the appropriate substitutions, number of bMSNs per gram can be

estimated to be:

$$N_{\text{bMSN}} = \frac{1}{\rho * \frac{4\pi r^3}{3} (1 - \frac{V_p}{V_p + V_s})} = \frac{0.749 (V_p + 0.455)}{\pi r^3} = \frac{0.238 (1.844 + 0.455)}{(82.68 \times 10^{-7})^3} = 9.68 \times 10^{14}$$

The theoretically calculated number was found to be very close to that determined using the NanoSight Technology  $\sim 8.97 \times 10^{11} \text{ bMSNs mL}^{-1}$  or  $3.59 \times 10^{14} \text{ g}^{-1}$ .

## **S.2. Calculation of the number of silanol groups per bMSN**

According to the Zhuravlev model, the number of silanol groups (Si-OH) per unit surface area of amorphous silica is depicted by a physico-chemical constant (known as the Kiselev–Zhuravlev constant) with a numerical value  $\sim 4.9 \text{ nm}^{-2}$ .<sup>[21]</sup> The number of silanol groups for bMSN (5 v/v%), thus calculated is presented in *Table S1*.

## **S.3. Calculation of the number of targeting ligands (TRC105) per bMSN**

Prior to conjugation, TRC105 was derivatized with Traut's Reagent, such that each antibody molecule possessed  $\sim 3$  –SH moieties (as determined by the Ellman's Reagent test).<sup>[31]</sup> Initial amount of TRC105-SH added to the nanoparticle solution = 45.80  $\mu\text{g}$  or  $1.83 \times 10^{14}$  molecules. After incubation with bMSN-PEG<sub>5k</sub>-Mal ( $\sim 8.97 \times 10^{11} \text{ mL}^{-1}$ ) for 3 h, the solution was centrifuged at 5000g to remove any unconjugated antibody. Amount of unreacted TRC105-SH in the supernatant was calculated from the Bradford Assay using the standard curve after polynomial fitting (*Figure S4*). Amount of unreacted TRC105-SH was determined to be  $\sim 35.82 \mu\text{g}$ . Thus,  $\sim 4.02 \times 10^{13}$  molecules of TRC105-SH were finally conjugated to the bMSN-PEG<sub>5k</sub>-Mal. Considering the number of nanoparticles per reaction to be  $\sim 8.97 \times 10^{11} \text{ mL}^{-1}$ , the number of TRC105-SH conjugated per nanoparticle per mL was determined to be  **$\sim 44.6$** .

## **S.4. Prediction of elimination half-life ( $t_{1/2\beta}$ ) of [<sup>89</sup>Zr]bMSN-PEG<sub>5k</sub>-TRC105**

Elimination half-life ( $t_{1/2\beta}$ ) of [<sup>89</sup>Zr]bMSN-PEG<sub>5k</sub>-TRC105 was roughly estimated using the quantification data obtained from serial PET scans in 4T1 tumor bearing mice ( $n = 4$ ). Equal volume regions-of-interest (ROIs) were drawn over the heart tissue in the PET images and used to calculate percentage injected dose per gram of tissue (%ID/g) at each time-point. All data was decay corrected and processed as previously described.<sup>[4]</sup> Bi-exponential fitting of the time-activity curve was used to estimate  $t_{1/2\beta}$  of [<sup>89</sup>Zr]bMSN-PEG<sub>5k</sub>-TRC105 (*Figure S7*).

## SUPPLEMENTARY TABLES AND FIGURES

**Table S1.** Number of silanol groups per nanoparticle

|                     | <b>Radius<br/>(nm)</b> | <b>Surface<br/>Area (m<sup>2</sup>/g)</b> | <b>No. of<br/>Nanoparticles<br/>per gram</b> | <b>Surface<br/>Area per<br/>Nanoparticle<br/>(nm<sup>2</sup>)</b> | <b>Total<br/>Number of<br/>Silanol<br/>Groups per<br/>Nanoparticle</b> |
|---------------------|------------------------|-------------------------------------------|----------------------------------------------|-------------------------------------------------------------------|------------------------------------------------------------------------|
| <b>bMSN(5 v/v%)</b> | 82.68                  | 741.92                                    | $3.59 \times 10^{14}$                        | $2.06 \times 10^6$                                                | $1.01 \times 10^7$                                                     |

**Table S2.** Sunitinib (SUN) loading and release

|             | <b>Amount Loaded<br/>(mg)</b> | <b>Loading<br/>Capacity (mg/g)</b> | <b>Loading<br/>Efficiency<br/>(%)</b> | <b>Cumulative<br/>Release<br/>(%)</b> |
|-------------|-------------------------------|------------------------------------|---------------------------------------|---------------------------------------|
| <b>dSN</b>  | 0.17                          | 46.63                              | 8.39                                  | -                                     |
| <b>MSN</b>  | 0.56                          | 155.09                             | 27.9                                  | 56.41                                 |
| <b>bMSN</b> | 0.83                          | 295.95                             | 41.4                                  | 68.90                                 |

**Table S3.** Bovine Serum Albumin (BSA) loading and release

|             | <b>Amount Loaded<br/>(mg)</b> | <b>Loading<br/>Capacity (mg/g)</b> | <b>Loading<br/>Efficiency<br/>(%)</b> | <b>Cumulative<br/>Release<br/>(%)</b> |
|-------------|-------------------------------|------------------------------------|---------------------------------------|---------------------------------------|
| <b>dSN</b>  | 0.02                          | 20.00                              | 1.5                                   | -                                     |
| <b>MSN</b>  | 0.15                          | 250.00                             | 15.0                                  | 80.0                                  |
| <b>bMSN</b> | 0.33                          | 589.28                             | 32.5                                  | 90.77                                 |

**Table S4.** Temporal variation in labeling yields of bMSN-NH<sub>2</sub> in 0.1 M HEPES buffer at 75 °C under different pH conditions

|                | pH 2 | pH 7 |
|----------------|------|------|
| <b>30 min</b>  | 19.1 | 67.2 |
| <b>60 min</b>  | 28.1 | 88.5 |
| <b>120 min</b> | 30.7 | 94.7 |

**Table S5.** Change in zeta potential during the stepwise synthesis of [<sup>89</sup>Zr]bMSN-PEG<sub>5k</sub>-TRC105. All measurements were performed in PBS (pH 7.4)

|                                                      | Zeta Potential (mV) |
|------------------------------------------------------|---------------------|
| <b>bMSN</b>                                          | -48.37 ± 0.31       |
| <b>bMSN-NH<sub>2</sub></b>                           | 9.58 ± 0.92         |
| <b>bMSN-PEG<sub>5k</sub></b>                         | -2.78 ± 0.33        |
| <b>bMSN-PEG<sub>5k</sub>-TRC105</b>                  | -1.28 ± 0.39        |
| <b>[<sup>89</sup>Zr]bMSN-PEG<sub>5k</sub>-TRC105</b> | -0.16 ± 0.06        |

**Table S6.** Tumor-to-muscle ratios calculated based on the PET ROI values (n=3)

|              | Targeted     | Non-targeted | Blocking    |
|--------------|--------------|--------------|-------------|
| <b>0.5 h</b> | 7.49 ± 2.55  | 2.16 ± 0.68  | 3.39 ± 0.64 |
| <b>4 h</b>   | 25.89 ± 3.55 | 5.04 ± 0.85  | 5.74 ± 0.17 |
| <b>24 h</b>  | 47.18 ± 7.19 | 9.75 ± 2.07  | 9.92 ± 2.82 |
| <b>48 h</b>  | 47.19 ± 8.41 | 7.95 ± 1.64  | 8.84 ± 2.32 |

**Table S7.** Simulated Body Fluid (SBF) composition (pH 7.4; 1 L)

| <b>Reagent</b>                                      | <b>Amount</b> |
|-----------------------------------------------------|---------------|
| NaCl                                                | 7.996 g       |
| NaHCO <sub>3</sub>                                  | 0.350 g       |
| KCl                                                 | 0.224 g       |
| K <sub>2</sub> HPO <sub>4</sub> · 3H <sub>2</sub> O | 0.228 g       |
| MgCl <sub>2</sub> · 6H <sub>2</sub> O               | 0.305 g       |
| 1M-HCl                                              | 40 mL         |
| CaCl <sub>2</sub>                                   | 0.278 g       |
| Na <sub>2</sub> SO <sub>4</sub>                     | 0.071 g       |
| (CH <sub>2</sub> OH) <sub>3</sub> CNH <sub>2</sub>  | 6.057 g       |

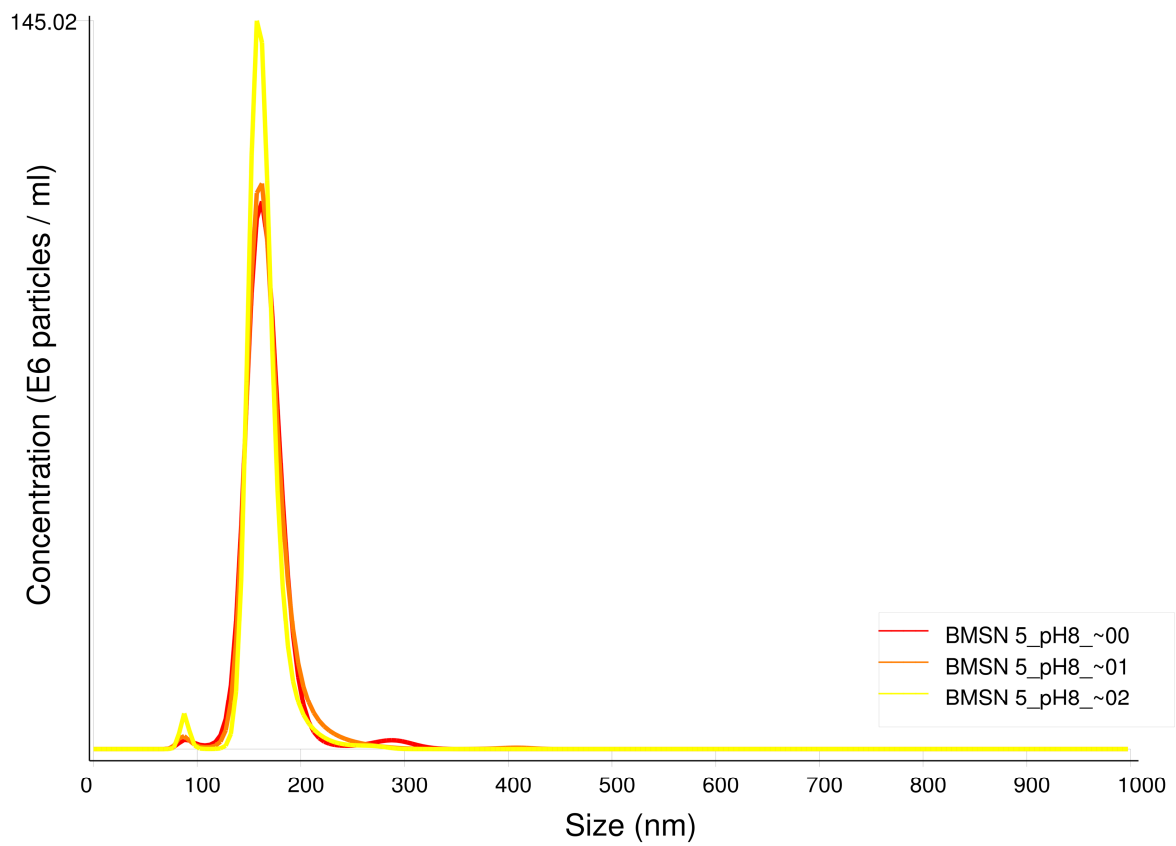

**Figure S1.** Size-Concentration graph for 1000-times diluted solution of bMSN (5 v/v%).



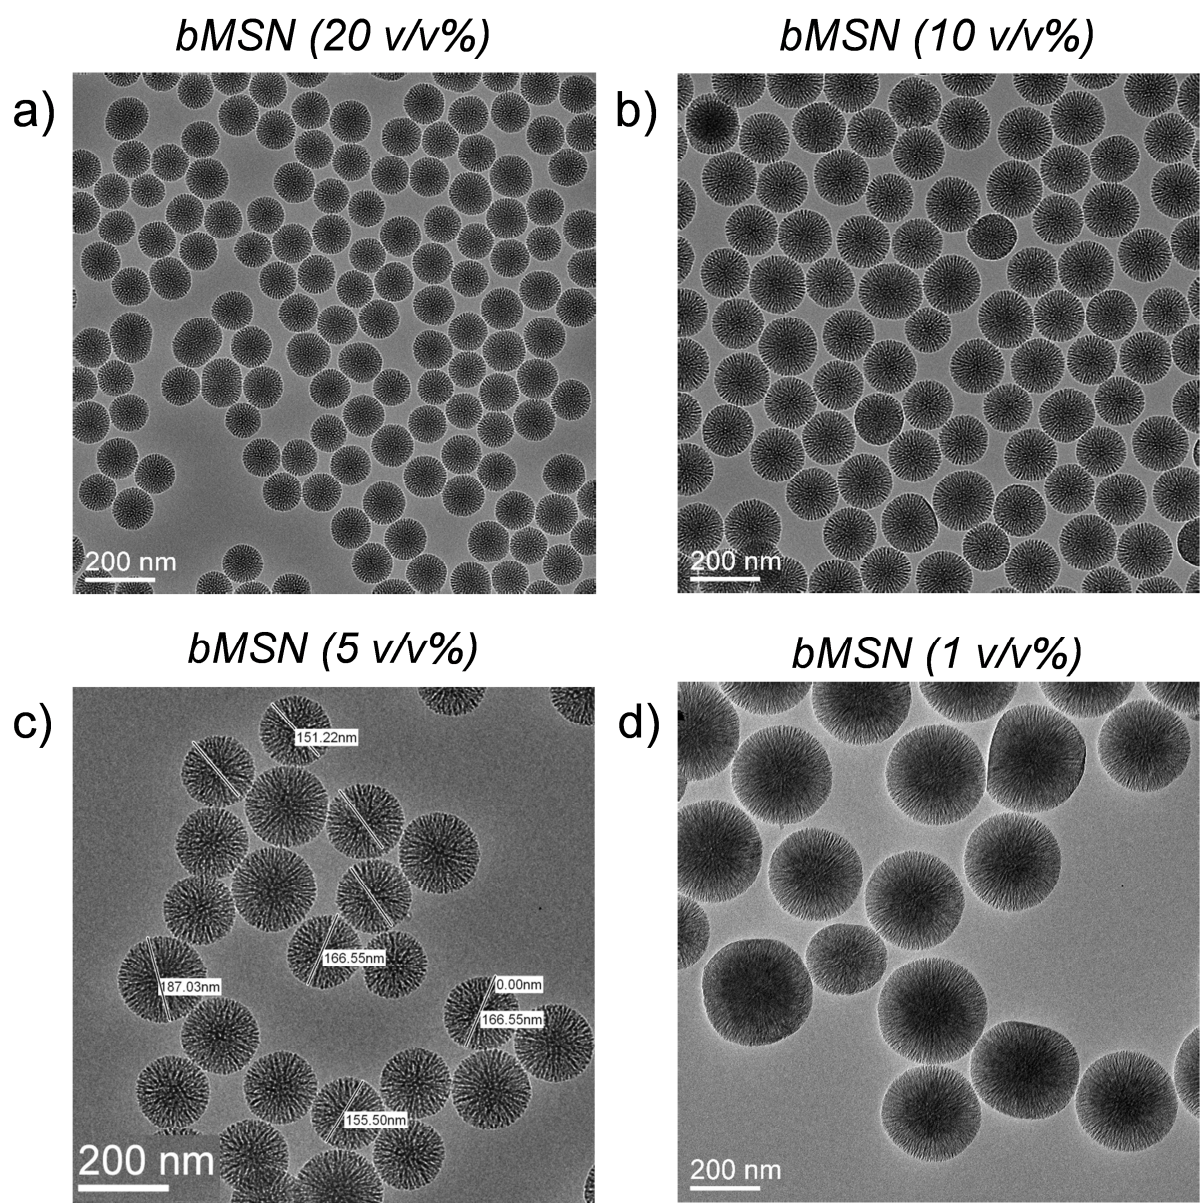

**Figure S2.** TEM images of bMSNs with varying compositions (TEOS: cyclohexane ratios) and pore sizes. (a) 20 v/v % (b) 10 v/v %, (c) 5 v/v % and (d) 1 v/v%

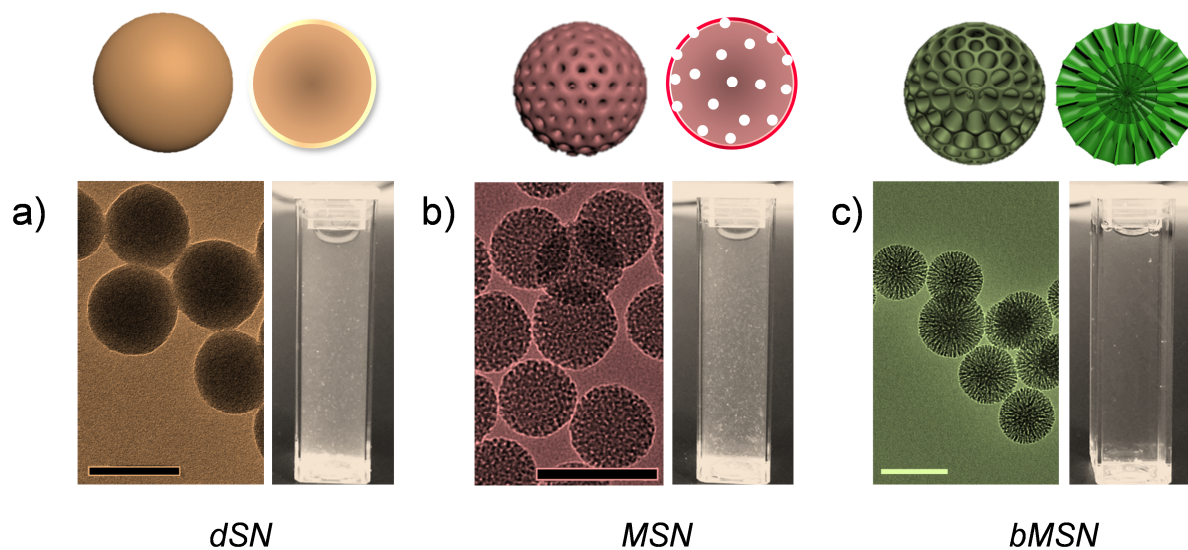

**Figure S3.** (a) TEM image of dSN (left) and a photograph of dSN solution after 21 days of incubation in SBF. (b) TEM image of MSN (left) and a photograph of MSN solution after 21 days of incubation in SBF. (c) TEM image of bMSN (left) and a photograph of bMSN solution after 21 days of incubation in SBF. Schematic on the top depicts the 3-D morphology and 2-D cross-sections of the corresponding nanoparticles.

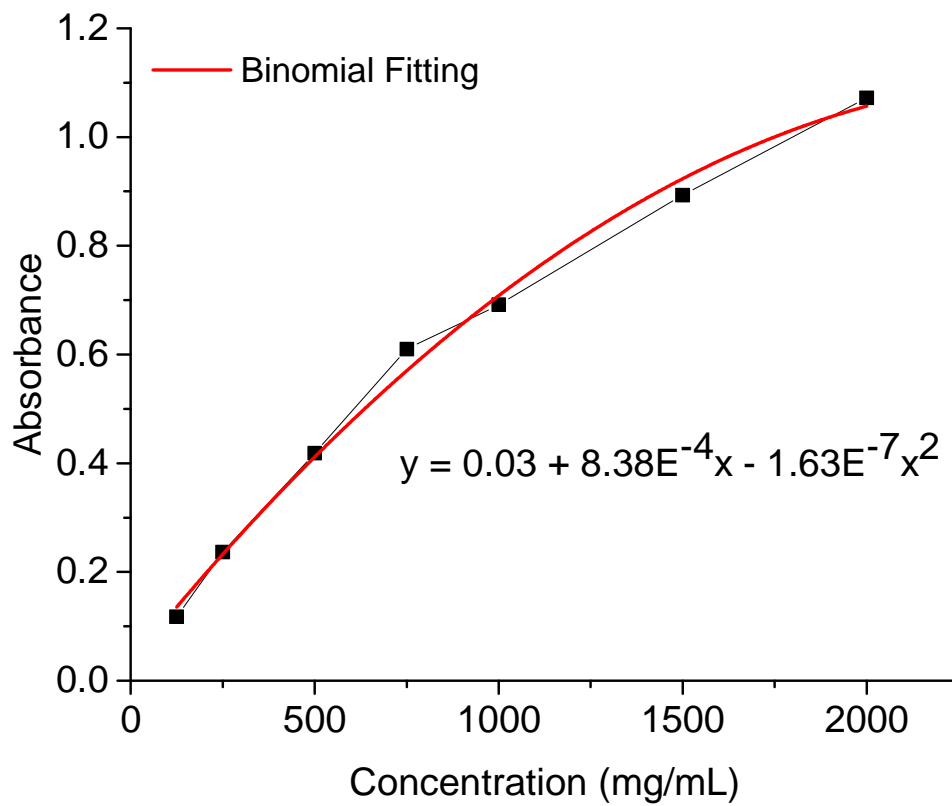

**Figure S4.** Equation and standard curve from Bradford Assay for calculation of number of TRC105 per bMSN.

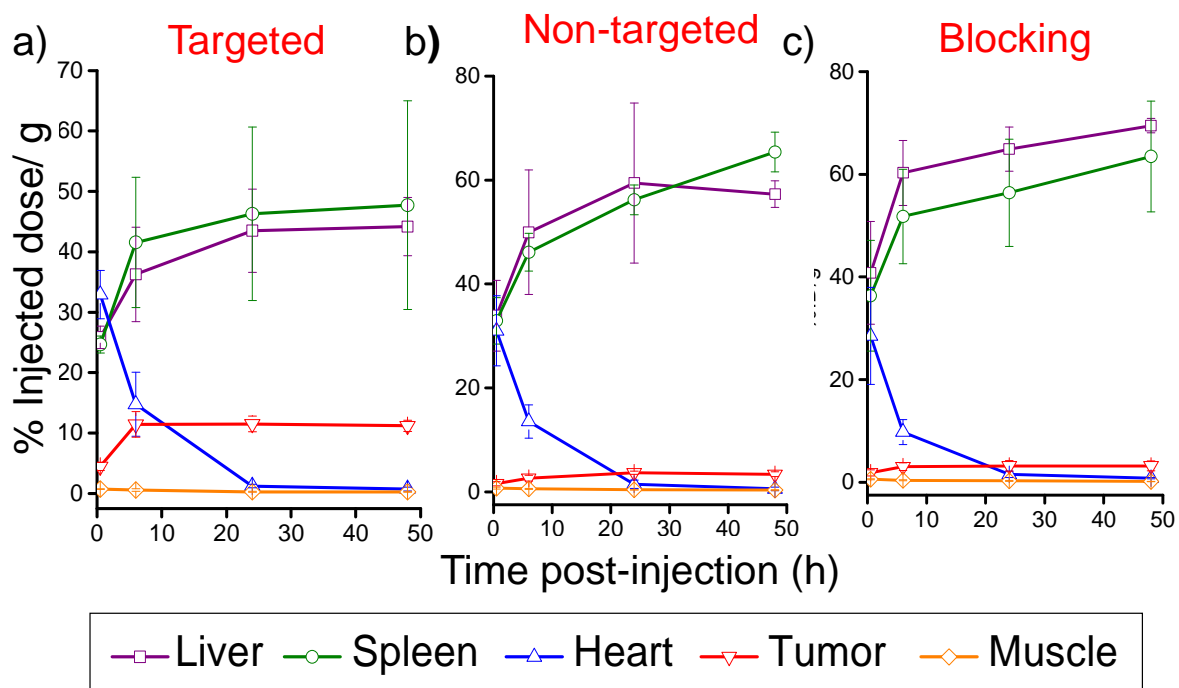

**Figure S5.** Region-of-interest (ROI) quantification. Time-activity curves for (a) targeted, (b) non-targeted, and (c) blocking groups.

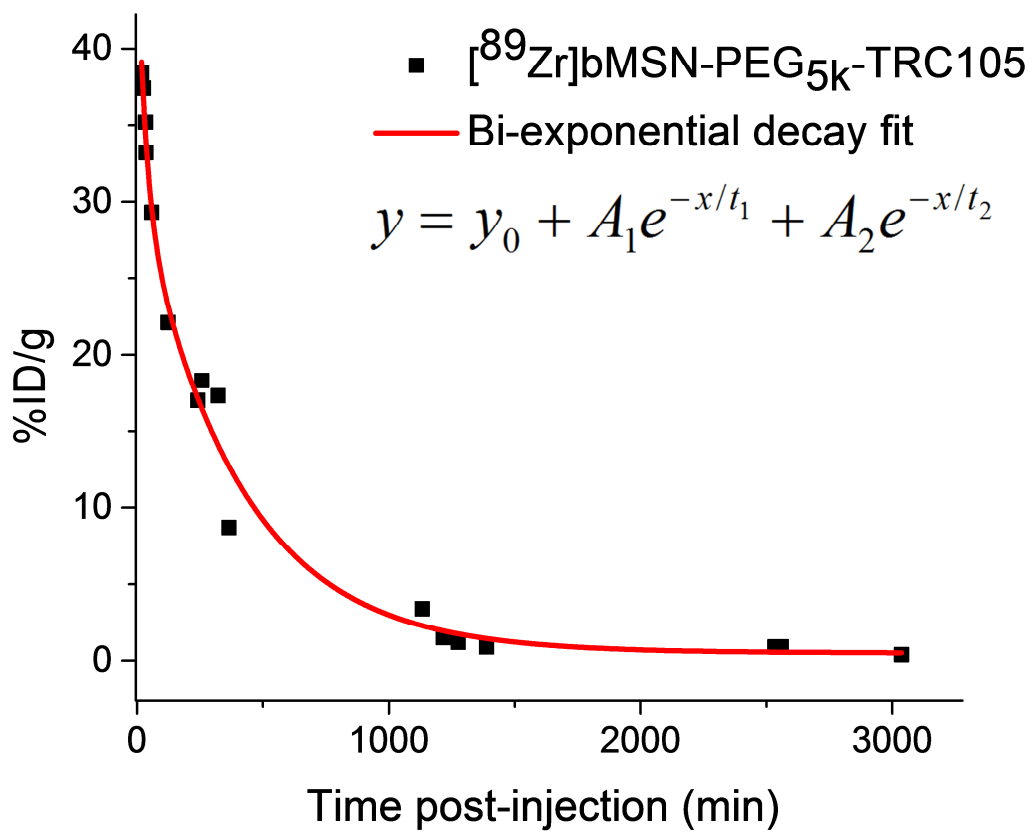

**Figure S6.** Bi-exponential fitting of the time-activity curve to determine the elimination half-life ( $t_{1/2\beta}$ ) for  $[^{89}\text{Zr}]b\text{MSN-PEG}_{5k}\text{-TRC105}$ .

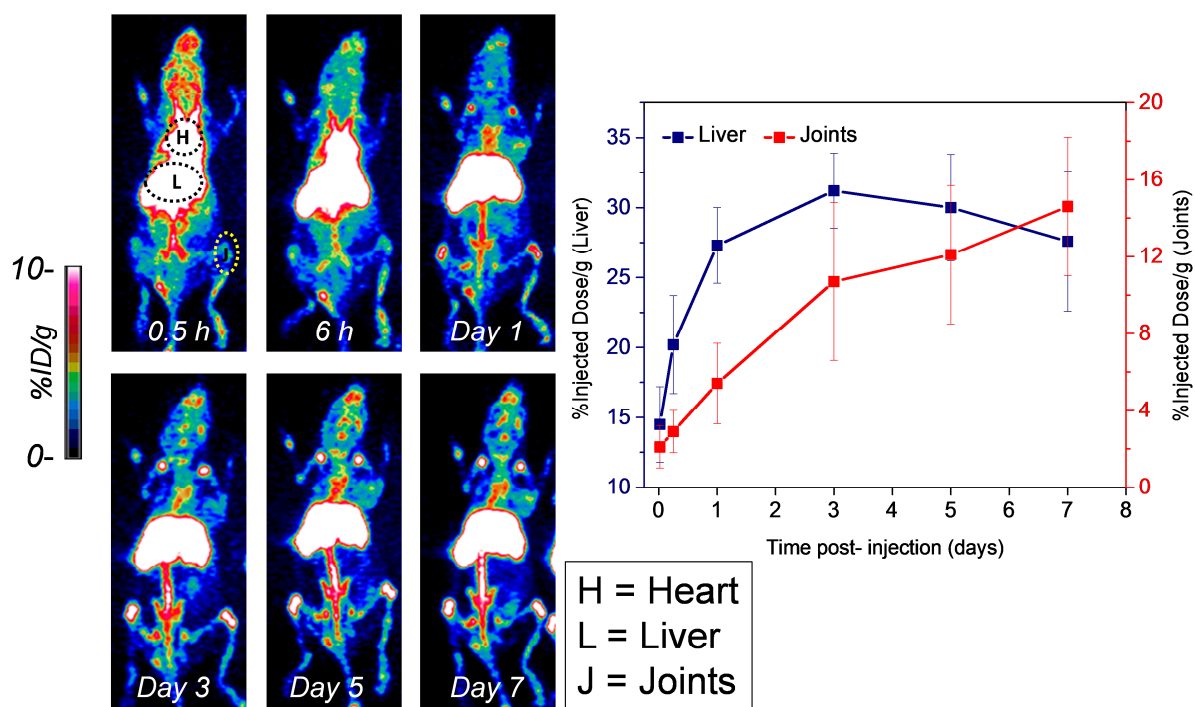

**Figure S7.** (a) Maximum-intensity-projections (MIP) of long term fate of  $[^{89}\text{Zr}]b\text{MSN-PEG}_{5k}\text{-TRC105}$  in healthy mice.

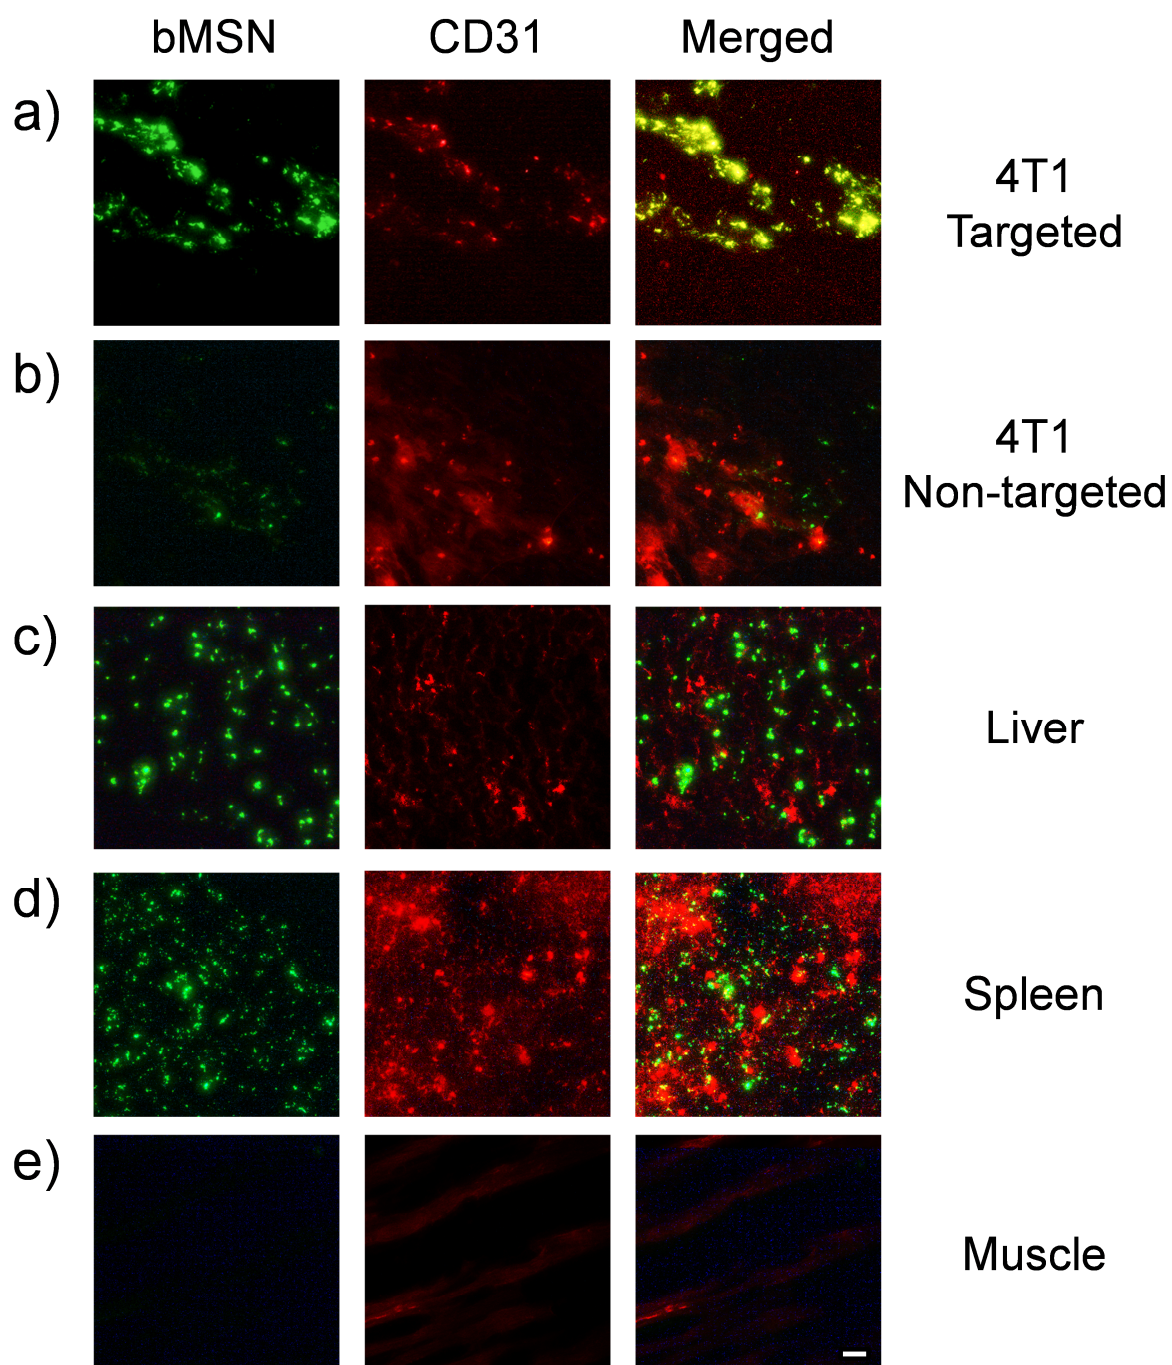

**Figure S8.** Ex vivo histology 6 h p.i. Fluorescein conjugated bMSNs are shown in green, (left panel) and immuno-stained CD31 is shown in red (middle panel). Merged images are also shown. Scale bar presents 50  $\mu$ m.

## References

- [1] L. Pan, Q. He, J. Liu, Y. Chen, M. Ma, L. Zhang, J. Shi, *J Am Chem Soc* 2012, 134, 5722.
- [2] Y. S. Lin, C. L. Haynes, *J Am Chem Soc* 2010, 132, 4834.
- [3] L. T. Zhuravlev, *Colloids Surf A* 2000, 173, 1.
- [4] J. Woodward, J. Tate, P. C. Herrmann, B. R. Evans, *J Biochem Biophys Methods* 1993, 26, 121.
- [5] H. Hong, G. W. Severin, Y. Yang, J. W. Engle, Y. Zhang, T. E. Barnhart, G. Liu, B. R. Leigh, R. J. Nickles, W. Cai, *Eur J Nuc Med Mol Imaging* 2012, 39, 138.
